# Supplementary material for: Characterization of TCDD-inducible poly-ADP-ribose polymerase (TIPARP/ARTD14) catalytic activity
Source: PubMed Central journal article supplement — Biochem J. 2018 Dec 10;475(23):3827–46. doi: 10.1042/BCJ20180347 (PMC6292455; doi:10.1042/bcj20180347), 2018-12-10
Supplement: BCJ-475-3827-s1.pdf [file BCJ-475-3827-s1.pdf]

## Supplementary data

**Supplementary Table S1.** PCR Primers used for cloning and site-directed mutagenesis.

| Name                | Sequence                                           |
|---------------------|----------------------------------------------------|
| TIPARP forward 1*   | 5'-CAAAGAATTCATGGAAATGGAAACCACCGAACC-3'            |
| TIPARP reverse 657  | 5'-CAAAGTCGACTCAAATGGAAACAGTGTTACTGAC-3'           |
| TIPARP reverse 234  | 5'CAAAGTCGACTCAAGTGTGGTACTGCAACTGGTTCAC-3'         |
| TIPARP reverse 448  | 5'-CAAAGTCGACTCAAAAAGTTTGCTGAAGTGACCCCAT-3'        |
| TIPARP forward 53   | 5'-CAAAGAATTCCTGAGGTCTTTGAGGCCAATATT-3'            |
| TIPARP forward 103  | 5'-CAAAGAATTCGCAGAAAATAATATGTCTGTTCTGAT-3'         |
| TIPARP forward 218  | 5'-CAAAGAATTCGCTTCCCTTGACCTCGTGTTTGA-3'            |
| TIPARP forward 328  | 5'-CAAAGAATTCCTACGAAGGCTGTCCACACCAC-3'             |
| TIPARP forward 345  | 5'-CAAAGAATTCACAGTCTGGAAATTCCTTCTG AGG-3'          |
| TIPARP forward 375  | 5'-CAAAGAATTCGGTCTGAAAGAGGTTCGATTTAT G-3'          |
| TIPARP forward 400  | 5'-CAAAGAATTCAAAAGGAGACCCCTCTCCGCT-3'              |
| TIPARP forward 425  | 5'-CAAAGAATTCGCTCCTCCACCTCTGAAGCAA-3'              |
| TIPARP forward 445  | 5'-CAAAGAATTCTCAGCAAACTTTTACCCTGAAACTT-3'          |
| TIPARP C39A forward | 5'-AGATCACTCCATTGAAGACTGCTTTTAAGAAAAAGGATCAGAA-3'  |
| TIPARP C39A reverse | 5'- TTCTGATCCTTTTTCTTAAAAGCAGTCTTCAATGGAGTGATCT-3' |

\* Number refers to amino acid in TIPARP.

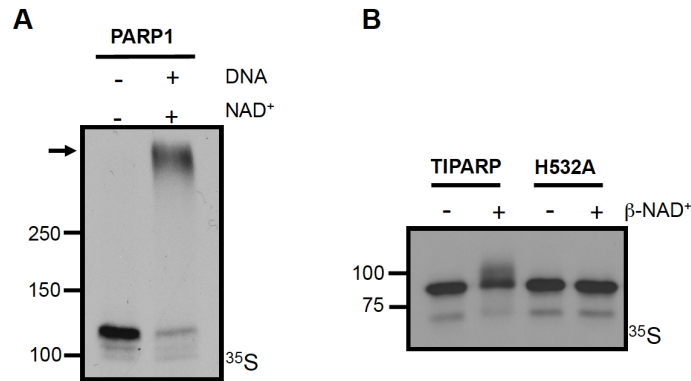

**Supplementary Figure S1. (A)** Mobility shift comparisons of modified and unmodified <sup>35</sup>S-labelled PARP1(ARTD1) and TIPARP. *In vitro* translated <sup>35</sup>S-labelled PARP1 and TIPARP were incubated with or without 500 μM NAD<sup>+</sup>, and analyzed by SDS-PAGE and autoradiography. Activated DNA was added to each reaction together with NAD<sup>+</sup>. The closed arrow denotes shift in molecular weight of PARP1 due to the addition of poly-ADP-ribose. **(B)** TIPARP catalytic point mutant (H532A) is inactive. The data are from three independent experiments.

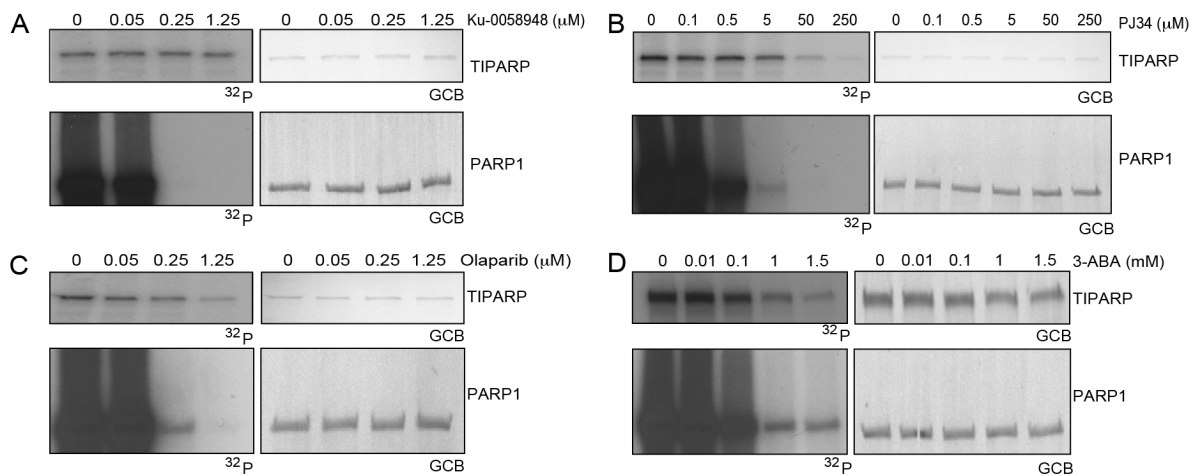

**Supplementary Figure S2. Inhibition of TIPARP and PARP1 catalytic activity by known PARP inhibitors.** GST-TIPARP or PARP1 proteins were incubated with various PARP1 inhibitors (**A**) Ku-0058948, (**B**) PJ34, (**C**) olaparib, or (**D**) 3-ABA at the indicated concentrations for 5 min at room temperature prior to the incorporation of 2  $\mu\text{Ci}$   $^{32}\text{P}$ -NAD<sup>+</sup> into the reaction. The reaction was stopped after a 20 min incubation at room temperature. Reactions involving the PARP1 enzyme were supplemented with activated DNA. ADP-ribosylation was detected by autoradiography after SDS-PAGE followed by transfer onto a PVDF membrane. GelCode Blue (GCB) staining shows levels of proteins loaded into SDS-PAGE gel. 3-ABA, 3-aminobenzamide. The data are representative of at least two independent experiments.

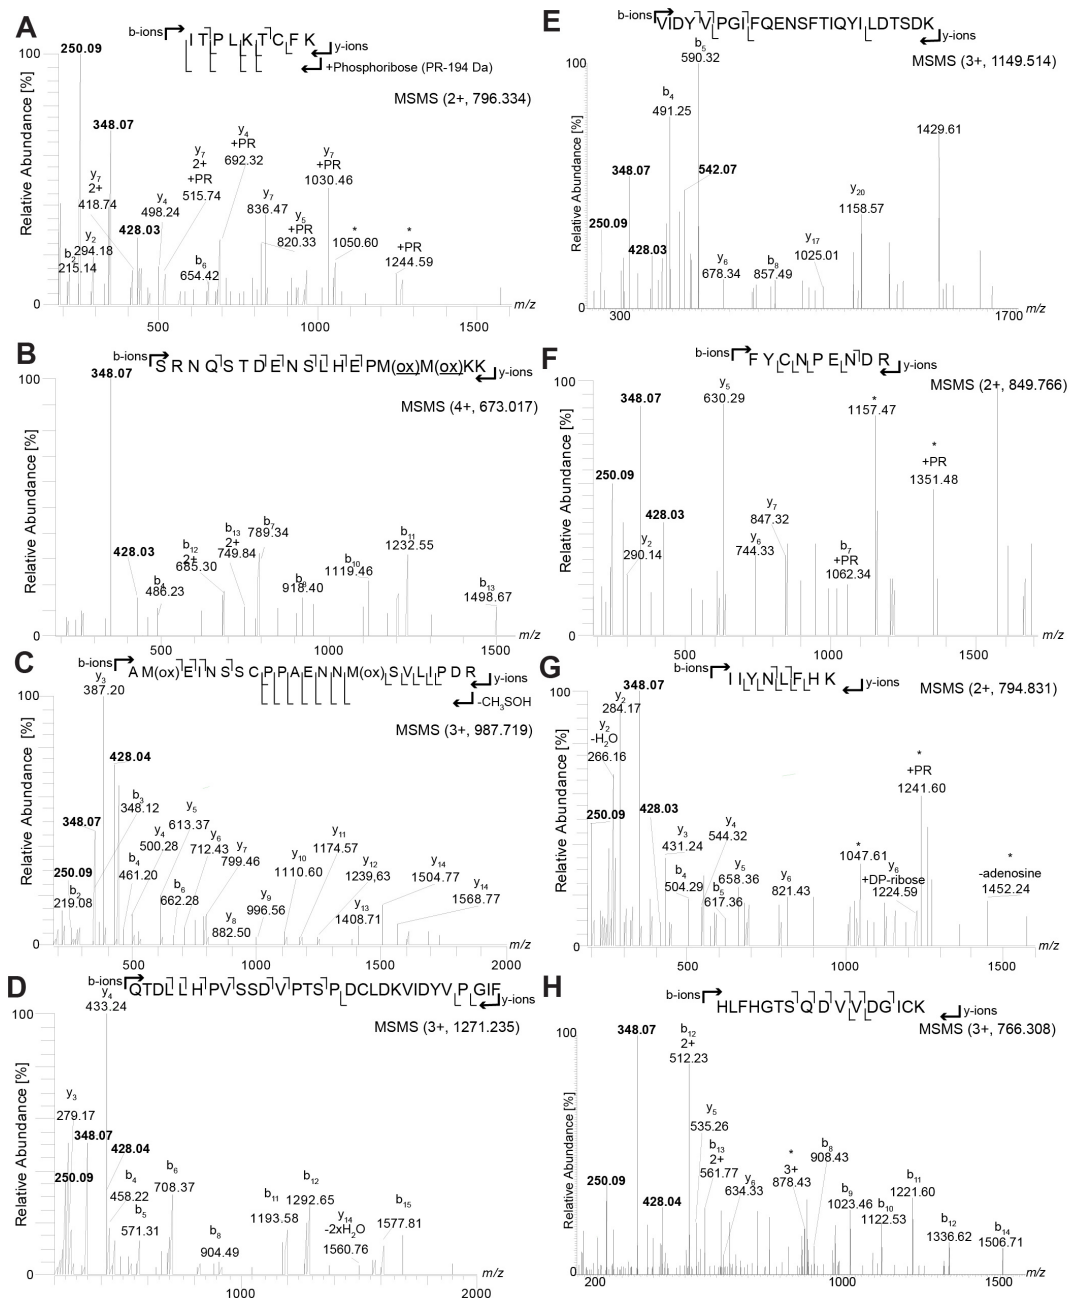

**Supplementary Figure S3. Identification of ADP-ribosylated peptides derived from endoprotease-cleaved TIPARP using MS.** Higher-energy collisional dissociation (HCD) fragmentation of ADP-ribosylated peptides yielded characteristic molecular ions at  $m/z$  428.03, at  $m/z$  349.07 and at  $m/z$  250.09 (corresponding to adenosine diphosphate, adenosine monophosphate and adenosine- $H_2O$  respectively). Asterisk denotes a peptide ion with a complete amino acid sequence. A peptide fragment ion carrying a phosphoribose moiety (mass addition of 194 Da) is denoted +PR. (A) The MS2 spectrum of the trypsin generated  $[M+2]^{2+}$  ion at  $m/z$  796.334. (B) The MS2 spectrum of the trypsin generated  $[M+3]^{3+}$  ion at  $m/z$  987.719. (C) The MS2 spectrum of the trypsin generated  $[M+4]^{4+}$  ion at  $m/z$  673.017. Note that only a single methionine in this peptide is oxidized with the underlined (ox) denoting that although only a single methionine is oxidized on this precursor ion, both oxidized forms are present in the MS2 spectrum. (D) The MS2 spectrum

of the chymotrypsin generated  $[M+3]^{3+}$  ion at  $m/z$  1271.235. **(E)** The MS2 spectrum of the trypsin generated  $[M+2]^{2+}$  ion at  $m/z$  849.766. **(F)** The MS2 spectrum of the trypsin generated  $[M+2]^{2+}$  ion at  $m/z$  794.831. **(G)** The doubly charged precursor ion at  $m/z$  794.831 corresponded to the peptide  $^{476}\text{IIYNLFHK}^{483}$  with a single ADP-ribosylated site. **(H)** The triply charged precursor ion at  $m/z$  766.308 corresponded to the peptide HLFHGT SQDVVDGICK with a single ADP-ribosylated site.

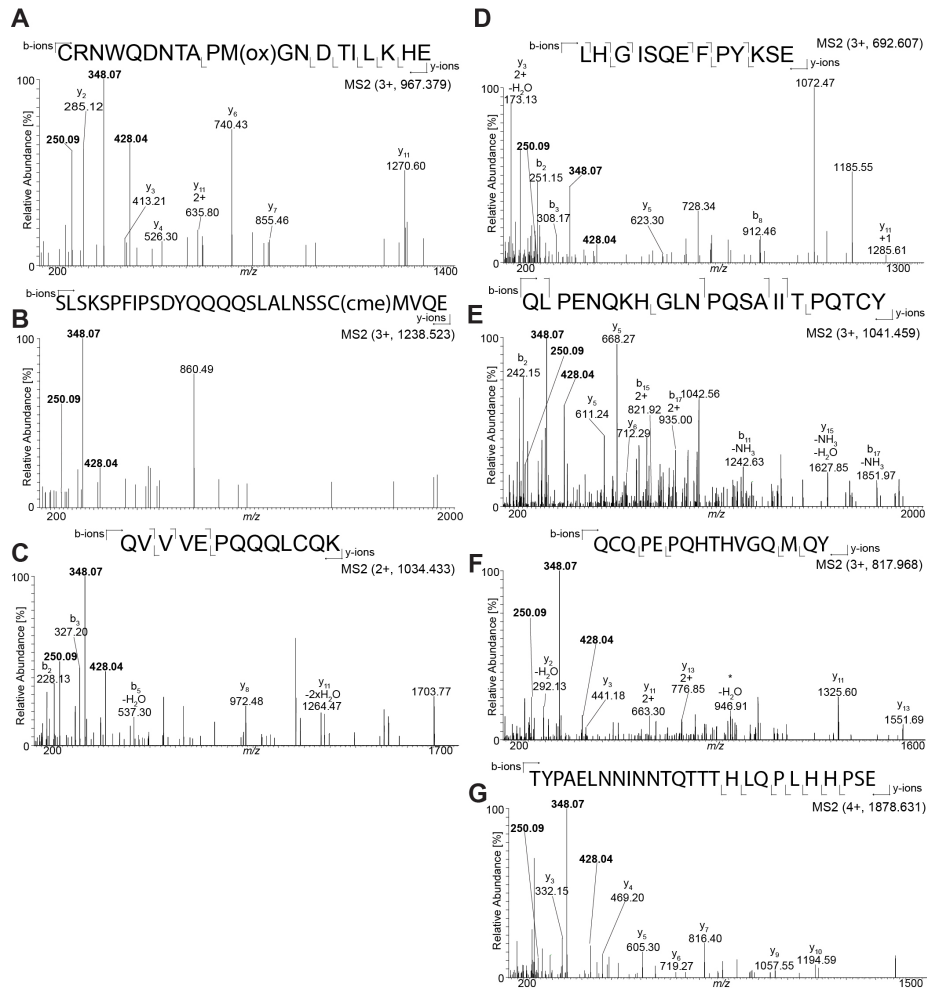

**Supplementary Figure S4. Identification of ADP-ribosylated peptides derived from endoprotease-cleaved AHR using MS.** Higher-energy collisional dissociation (HCD) fragmentation of ADP-ribosylated peptides yielded characteristic molecular ions at  $m/z$  428.03, at  $m/z$  349.07 and at  $m/z$  250.09 (corresponding to adenosine diphosphate, adenosine monophosphate and adenosine- $H_2O$  respectively). **(A)** The MS2 spectrum of the trypsin generated  $[M+3]^{3+}$  ion at  $m/z$  967.379 corresponding to the peptide CRNWQDNTAPMGNDTI LKHE with a single ADP-ribosylation. **(B)** The MS2 spectrum of the trypsin generated  $[M+3]^{3+}$  ion at  $m/z$  1238.523 corresponding to the peptide SLSKSPFIPSDYQQQQLALNSSCMVQE with a single ADP-ribosylation. **(C)** The MS2 spectrum of the trypsin generated  $[M+2]^{2+}$  ion at  $m/z$  1034.433 corresponding to the peptide QVVVEPQQQLCQK with a single ADP-ribosylation. **(D)** The MS2 spectrum of the GluC generated  $[M+3]^{3+}$  ion at  $m/z$  692.607 corresponding to the peptide LHGISQEFYPYKSE with a single ADP-ribosylation. **(E)** The MS2 spectrum of the chymotrypsin generated  $[M+3]^{3+}$  ion at  $m/z$  1041.459 corresponding to the peptide QLPENQKHGLNPQSAIITPQTCY with a single ADP-ribosylation. The MS2 spectrum of the trypsin generated  $[M+2]^{2+}$  ion at  $m/z$  817.968 corresponding to the peptide QCQPEPQHTHVGMQY with a single ADP-ribosylation. **(G)** The MS2 spectrum of the GluC generated  $[M+4]^{4+}$  ion at  $m/z$  1878.631 corresponding to the peptide TYPALNNINNTQTTHLQPLHHPSE with a single ADP-ribosylation.

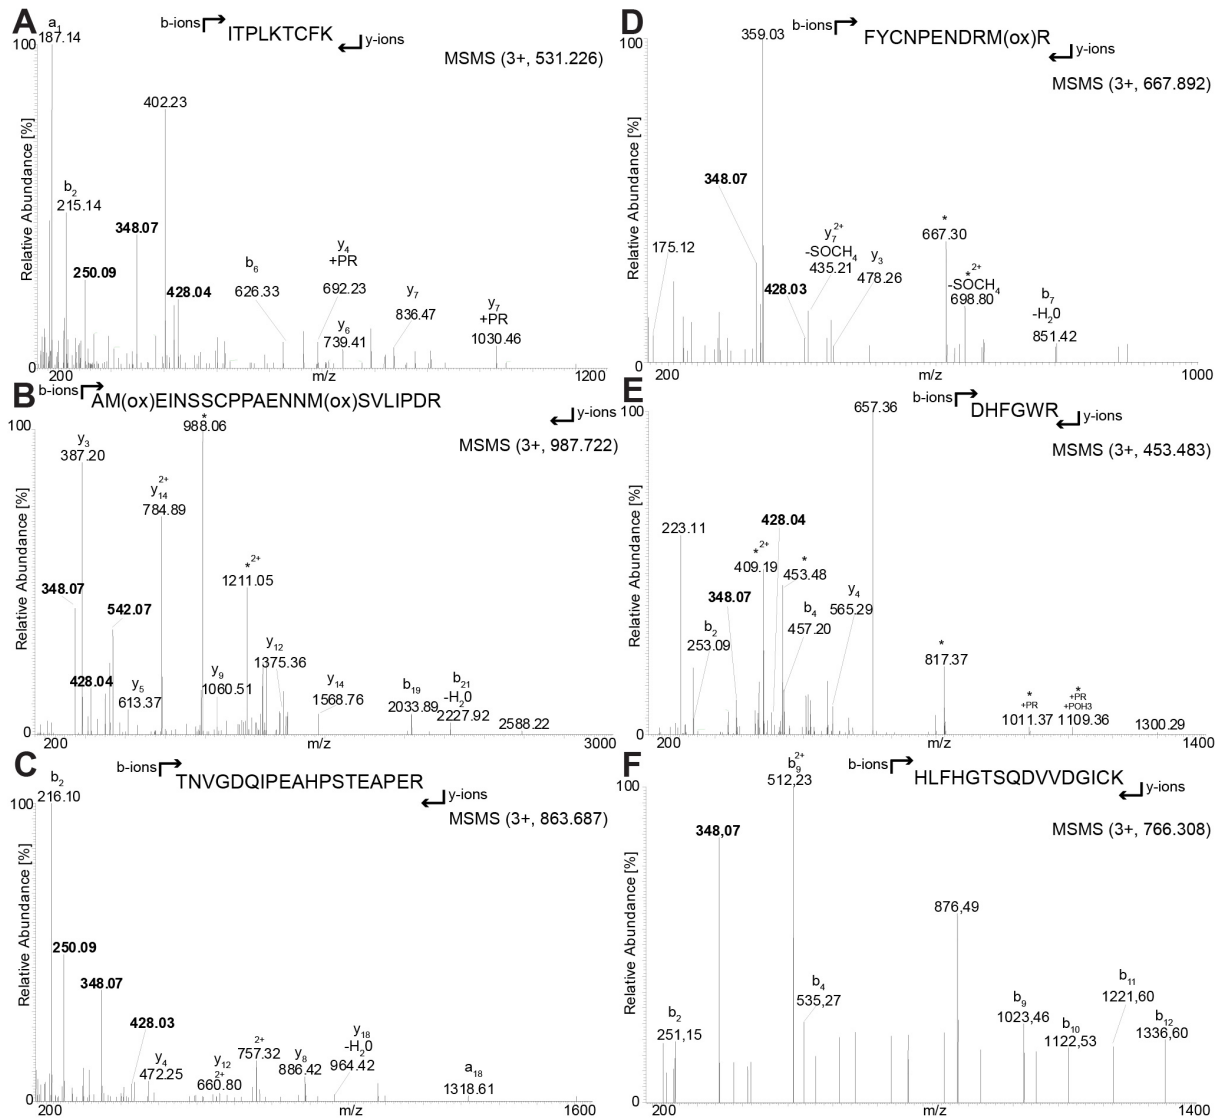

**Supplementary Figure S5. Identification of ADP-ribosylated peptides derived from endoprotease-cleaved GFP-TIPARP using MS.** Higher-energy collisional dissociation (HCD) fragmentation of ADP-ribosylated peptides yielded characteristic molecular ions at  $m/z$  428.03, at  $m/z$  349.07 and at  $m/z$  250.09 (corresponding to adenosine diphosphate, adenosine monophosphate and adenosine- $\text{H}_2\text{O}$  respectively). **(A)** The MS2 spectrum of the trypsin generated  $[\text{M}+3]^{3+}$  ion at  $m/z$  531.226 corresponded to the peptide  $^{33}\text{ITPLKTCFK}^{41}$  with a single ADP-ribose. **(B)** The MS2 spectrum of the trypsin generated  $[\text{M}+3]^{3+}$  ion at  $m/z$  967.722 corresponding to the peptide  $^{93}\text{AM(ox)EINSSCPPAENNM(ox)SVLIPDR}^{114}$  with a single ADP-ribosylation. **(C)** The MS2 spectrum of the trypsin generated  $[\text{M}+3]^{3+}$  ion at  $m/z$  863.687 corresponding to the peptide  $\text{TNVGDQIPEAHPSTEAPER}$  with a single ADP-ribosylation. **(D)** The MS2 spectrum of the trypsin generated  $[\text{M}+3]^{3+}$  ion at  $m/z$  667.892 corresponding to the peptide  $^{294}\text{FYCNPENDRM(ox)R}^{300}$  with a single ADP-ribosylation. **(E)** The MS2 spectrum of the chymotrypsin generated  $[\text{M}+3]^{3+}$  ion at  $m/z$  453.483 corresponding to the peptide  $\text{DHFGWR}$  with a single ADP-ribosylation. **(F)** The MS2 spectrum of the trypsin generated  $[\text{M}+3]^{3+}$  ion at  $m/z$  766.308 corresponding to the peptide  $\text{HLFHGTSDVVDGICK}$  with a single ADP-ribosylation.

### **Additional information about the identification of the mono-ADP-ribosylated peptides in TIPARP.**

The mass spectra from ADP-ribosylated peptides in TIPARP were probed against an in-house generated protein database containing the GST-tagged TIPARP amino acid sequence. This allowed for up to three dynamic ADP-ribosylation modifications of 541.0611 Da per peptide (1). The b- and y-ions were *de novo* sequenced to verify the peptide sequence and we considered ADP-ribosylated peptides with sequence overlap due to incomplete trypsin cleavage sites as single unique ADP-ribosylated peptides. Using this approach, we identified 8 unique ADP-ribosylated peptides in TIPARP (Supplementary Fig. S3A-H). The doubly charged precursor ion at  $m/z$  796.334 (observed mass of 1591.661 Da  $[M+H^+]$ ) corresponded to the peptide  $^{33}ITPLKTCFK^{41}$  (theoretical mass 1050.602 Da  $[M+H^+]$ ) with a single ADP-ribose (theoretical mass 541.061 Da). In the low mass area the reporter ions for ADP-ribose at  $m/z$  428.03, at  $m/z$  348.07 and at  $m/z$  250.09 could be detected. By *de novo* sequencing of the peptide we detected, the y-ions  $y_2$ ,  $y_4$ ,  $y_5$  and  $y_7$  corresponding to the sequences FK, TCFK, KTCFK and PLKTCFK, respectively. As expected, the  $y_7$  ion was particularly prominent due to the proline effect (2). Two b-ions,  $b_2$  and  $b_6$  corresponding to the sequences IT and ITPLKT were also detected. Moreover, the y-ions  $y_9$ ,  $y_7$ ,  $y_4$  and  $y_5$  were detected with the mass addition of 193.82 Da, corresponding to a phosphoribose addition (3), demonstrating that the ADP-ribosylated site was located within the sequence  $^{38}TCFK^{41}$ . A similar strategy was used to identify the remaining 6 ADP-ribosylated peptides. Fig. S3B) The triply charged precursor ion at  $m/z$  987.719 (observed mass of 2961.143 Da  $[M+H^+]$ ) corresponded to the peptide  $^{93}AM(ox)EINSSCPAENNM(ox)SVLIPDR^{114}$  (theoretical mass 2420.089 Da  $[M+H^+]$ ) with one ADP-ribose. Three reporter ions for ADP-ribose were detected in the low mass area of the MS2 spectrum. Several b- and y-ions were identified by *de novo* sequencing of the peptide. As expected, y-ions from  $y_8$  (corresponding to the sequence M(ox)SVLIPDR) and N-terminal of  $y_8$  showed the characteristic loss of methanesulfenic acid ( $CH_3SOH$ , 64 Da) from oxidized Met. Fig. S3C) The quadruple charged precursor ion at  $m/z$  673.017 (observed mass of 2689.047 Da  $[M+H^+]$ ) corresponded to the peptide  $^{75}SRNQSTDENSLHEPMMKK^{92}$  with a single oxidized Met (theoretical mass 2147.981 Da  $[M+H^+]$ ) with a single ADP-ribose. Note that peptides with either oxidized Met89 or Met90 will be present. In the low mass area of the MS2 spectrum, two reporter ions indicative of ADP-ribosylation were detected. *De novo* sequencing of the peptide by y-ions were problematic due to the presence of two Lys residues at the C-terminal and a single oxidized methionine. However, the presence of the Arg76 allowed for extensive b-ion sequencing and verification of the peptide sequence. Fig. S3D) The doubly charged precursor ion at  $m/z$  849.766 (observed mass of 1698.525 Da  $[M+H^+]$ ) corresponded to the peptide  $^{294}FYCNPENDR^{300}$  (theoretical mass 1157.468 Da  $[M+H^+]$ ) with a single ADP-ribosylation site. Fig. S3E) The triply charged precursor ion at  $m/z$  1271.235 (observed mass of 3811.691 Da  $[M+H^+]$ ) corresponded to the peptide  $^{169}QTDLLHPVSSDVPTSPDCLDKVIDYVPGIF^{189}$  (theoretical mass 3270.624 Da  $[M+H^+]$ ) with a single ADP-ribose. Fig. S3F) The triply charged precursor ion at  $m/z$  1149.514 (observed mass of 3448.542 Da  $[M+H^+]$ ) corresponded to the peptide  $^{190}VIDYVPGIFQENSFTIQYILDTS DK^{214}$  (theoretical mass 2905.451 Da  $[M+H^+]$ ) with a single ADP-ribose. Fig S3G) The doubly charged precursor ion at  $m/z$  794.831 (observed mass of 1588.655 Da  $[M+H^+]$ ) corresponded to the peptide  $^{476}IYNLFHK^{483}$  (theoretical mass 1047.5986 Da  $[M+H^+]$ ) with a single ADP-ribosylated site. By using *de novo* sequencing of the peptide and analysis of b- and y-ions, we detected the  $y_6$  ion with a diphosphoribose (DP-ribose), demonstrating that the ADP-ribose was attached to the C-terminal of  $y_6$ , within the sequence  $^{478}YNLFHK^{483}$ . Fig S3H) The triply charged precursor ion at  $m/z$



766.308 (observed mass of 2296,91 Da [M+H<sup>+</sup>]) corresponded to the peptide HLFHGTSQDVVDGICK (theoretical mass 1755.848 Da [M+H<sup>+</sup>]) with a single ADP-ribosylated site.

### References for Supplementary Data

1. Matic, I., Ahel, I. and Hay, R.T. (2012) Reanalysis of phosphoproteomics data uncovers ADP-ribosylation sites. *Nat Methods*, **9**, 771-772.
2. Bleiholder, C., Suhai, S., Harrison, A.G. and Paizs, B. (2011) Towards understanding the tandem mass spectra of protonated oligopeptides. 2: The proline effect in collision-induced dissociation of protonated Ala-Ala-Xxx-Pro-Ala (Xxx = Ala, Ser, Leu, Val, Phe, and Trp). *J Am Soc Mass Spectrom*, **22**, 1032-1039.
3. Jiang, H., Sherwood, R., Zhang, S., Zhu, X., Liu, Q., Graeff, R., Kriksunov, I.A., Lee, H.C., Hao, Q. and Lin, H. (2013) Identification of ADP-ribosylation sites of CD38 mutants by precursor ion scanning mass spectrometry. *Anal Biochem*, **433**, 218-226.
